# Supplementary material for: A microfluidic system for the cultivation of cyanobacteria with precise light intensity and CO 2 control: enabling growth data acquisition at single-cell resolution
Source: Royal Society of Chemistry journal article supplement (doi:10.1039/d4lc00567h), 2024-09-30
Supplement: d4lc00567h1.xlsx [file d4lc00567h1.xlsx]

## Sheet: Growth rate transformation
Model parameters (Table 3)					Growth rate transformation
Parameter	µ_max	alpha	I 1/2		MC growth rate [h-1]	0.064	Maximum growth rate in the MC at ambient air aeration
Unit	h-1	(h*µE*m^-2*s^-1)^-1	µE*m^-2*s^-1		Equivalent µFluidic Light intensity [µE*m^-2*s-^1]	31.0253	First MC Growth rate is inserted into the count based growth model. Subsequnetly the model is solved for I.
Area based	0.087	0.00216	22.1248		Equivalent area based growth rate [h-1]	0.0562972	Then the Equivalent µFluidic Light intensity is inserted into the area based growth model to calculate the equivalent area based growth rate.
Count based	0.096	0.00249	21.1781
Equation 4					Insertion into Equation 4
Parameter	µ_sat	K_CO2		Carbon dioxide concentration	9.59881	The Equivalent area based growth rate is inserted into Equation 4. The Equation is solved for c_CO2
Unit	h-1	(h*µE*m^-2*s^-1)^-1		Then the equilibrium is according to Henry's law is calculated on the next page
Value	0.09436	6.4898

## Sheet: CO2 Solubility
Solubility CO2 in Water
Empiric temperature dependency of Henry-Coefficient (Corroll et al., 1991)
Parameter	Unit	Value
a		-6.8346
b	K	12817
c	K^2	-3766800
d	K^3	299700000
Temperature	°C	37
ablolute Temperature	K	310.15
Solubility of CO2 in water according to Henry's law
Parameter	Unit	Value
Henry coefficient	Mpa	216.436
Absolute pressure	MPa	0.1
Fugacity	-	1
CO2 concentration	ppm	9.59881
molar Fraction CO2 in Air in mol/mol	mol/mol	9.59881e-06
Solubility CO2 in Water in mol/mol	mol/mol	4.43494e-09
Convert concentration from mol/mol to g/L
Parameter	Unit	Value
Mw H20	g/mol	18.015
Density H20	g/L	1000
Mw CO2	g/mol	44.01
Concentration CO2 in Water	g/L	1.08344e-05
Concentration CO2 in Water	mol/L	2.4618e-07
